# Supplementary material for: Vapor-phase synthesis of a reagent-free self-healing polymer film with rapid recovery of toughness at room temperature and under ambient conditions
Source: Royal Society of Chemistry journal article supplement (doi:10.1039/d2sm00640e), 2022-01-01
Supplement: d2sm00640e4.pdf [file d2sm00640e4.pdf]

## Supplementary Information

### **Vapor-Phase Synthesis of a Reagent-free Self-Healing Polymer Film with Rapid Recovery of Toughness at Ambient in Room Temperature**

Kihoon Jeong<sup>a,†</sup>, Moo Jin Kwak<sup>a,†</sup>, Youson Kim<sup>a</sup>, Youjin Lee<sup>a</sup>, Hyeonwoo Mun<sup>a</sup>, Min Ju Kim<sup>b</sup>, Byung Jin Cho<sup>c</sup>,  
Siyoung Q. Choi<sup>a,d \*</sup>, and Sung Gap Im<sup>a,d \*</sup>

<sup>a</sup>*Department of Chemical and Biomolecular Engineering, Korea Advanced Institute of Science and Technology (KAIST), Daejeon 34141, Republic of Korea.*

<sup>b</sup>*School of Electronic and Electrical Engineering, Dankook University, Gyeonggi-do 16890, Republic of Korea.*

<sup>c</sup>*Department of Electrical Engineering, Korea Advanced Institute of Science and Technology (KAIST), Daejeon 34141, Republic of Korea.*

<sup>d</sup>*KAIST Institute for NanoCentury (KINC), Korea Advanced Institute of Science and Technology (KAIST), Daejeon 34141, Republic of Korea*

|      | Flow rate [sccm] |      |      | Pressure<br>[mTorr] | Substrate<br>temperature<br>[°C] |
|------|------------------|------|------|---------------------|----------------------------------|
|      | GMA              | HEA  | TBPO |                     |                                  |
| pGH1 | 0.26             | 0.42 | 0.49 | 150                 | 30                               |
| pGH2 | 0.43             | 0.42 | 0.49 | 150                 | 30                               |
| pGH3 | 0.79             | 0.42 | 0.49 | 150                 | 30                               |

**Table S1.** A summary of the iCVD process condition for the synthesis of poly(glycidylmethacrylate-*co*-2-hydroxyethyl acrylate), (pGH) copolymer films.

| Reference                                                  | Dynamic bonding                               | Healed toughness (MJ·m <sup>-3</sup> ) | Time for healing  | Condition for healing  |
|------------------------------------------------------------|-----------------------------------------------|----------------------------------------|-------------------|------------------------|
| <i>ACS Appl. Mater. Interfaces</i> , 2019, 11, 46165-46175 | Hydrogen bond                                 | 7.7                                    | 1 min             | Room temperature (RT)  |
| <i>ACS Appl. Mater. Interfaces</i> , 2020, 12, 6383-6395   | Hydrogen bond, Diteluride                     | 105.2                                  | 10 min            | Visible light, RT      |
|                                                            | Hydrogen bond, Diteluride                     | 3.67                                   | 1 min             | Visible light, RT      |
| <i>Adv. Mater.</i> , 2018, 30, 1706846                     | Hydrogen bond                                 | 1.84                                   | 12 h              | Dodecane, RT           |
| <i>Nature Electronics</i> , 2019, 2(2), 75-82.             | Ionic interaction                             | 0.151                                  | 3 h               | Water, RT              |
| <i>J. Am. Chem. Soc.</i> , 2015, 137, 4846-4850            | Hydrogen bond, Catalyst induced covalent bond | 9.75                                   | 3 h               | 25 °C                  |
| <i>Adv. Mater.</i> , 2017, 29, 1702616                     | Hydrogen bond                                 | 0.694                                  | 1 h               | RT                     |
| <i>J. Am. Chem. Soc.</i> , 2019, 141(7), 3249-3257.        | Anisyl group, ethylene base polymer           | 5.7                                    | 5 min             | 25 °C                  |
| <i>Nature Chemistry</i> , 2016, 8(6), 618-624.             | Metal coordination bond                       | 0.718                                  | 4 h               | RT                     |
| <i>ACS Appl. Mater. Interfaces</i> , 2020, 12, 9833-9841   | Ionic interaction                             | 1.71                                   | 10 min            | 10 MPa pressure, 80 °C |
| <i>J. Mater. Chem. C</i> , 2020, 8, 2043-2053              | Hydrogen bond                                 | 1.9                                    | 1 h               | 25 °C                  |
| <i>New J. Chem.</i> , 2019, 43, 7701-7707                  | Boronate ester, pi-pi interaction             | 2.4                                    | 2 min             | Hydrogel, RT           |
|                                                            | Boronate ester, pi-pi interaction             | 0.53                                   | 0.5 min           | Hydrogel, RT           |
| <i>Biosensors and Bioelectronics</i> , 2020, 150, 111946   | Hydrogen bond                                 | 7.68                                   | 0.5 min           | 25 °C                  |
| <i>ACS Appl. Mater. Interfaces</i> , 2017, 9, 20106-20114  | Metal coordination bond                       | 0.273                                  | 30 min            | RT                     |
| <i>Nature Mater.</i> , 2013, 12(10), 932-937.              | Hydrogen bond                                 | 1.45                                   | 24 h              | Hydrogel, 25 °C        |
| <i>Adv. Mater.</i> , 2017, 29, 1604951                     | Host-guest complex                            | 0.776                                  | 30 min            | Hydrogel, RT           |
| <i>Adv. Mater.</i> , 2017, 29, 1605325                     | Host-guest complex                            | 3.55                                   | 60 min            | Hydrogel, RT           |
| <i>Small</i> , 2019, 15, 1804651                           | Metal coordination bond                       | 0.568                                  | 5 min             | RT                     |
| <i>Nature</i> , 2008, 451(7181), 977-980.                  | Hydrogen bond                                 | 0.222                                  | 5 min             | Dodecane, 40 °C        |
| <i>J. Am. Chem. Soc.</i> , 2018, 140, 5280-5289            | Hydrogen bond                                 | 9.42                                   | 6 h               | RT                     |
| <i>Adv. Mater.</i> , 2018, 30, 1705145                     | Disulfides                                    | 0.699                                  | 3 min             | 25 °C                  |
|                                                            | Disulfides                                    | 26.9                                   | 2 h               | 25 °C                  |
| <i>Macromolecules</i> , 2021, 54, 888-895                  | Hydrogen bond                                 | 1.68                                   | 24 h              | 22 °C                  |
| <i>Adv. Funct. Mater.</i> , 2021, 2007457                  | Hydrogen bond                                 | 0.058                                  | 20 min            | Hydrogel, 37 °C        |
| <i>J. Mater. Sci.</i> , 2021, 56, 2725-2737                | Hydrogen bond                                 | 2.34                                   | 4 h               | Hydrogel, RT           |
| <i>Adv. Funct. Mater.</i> , 2021, 2101825                  | Disulfide, hydrogen bond, Coordination bond   | 1.9                                    | 10 min            | RT                     |
| <i>ACS Appl. Mater. Interfaces</i> 2020, 12, 35445-35452   | Hydrogen bond                                 | 12.05                                  | 40 s              | RT                     |
| <b>This work</b>                                           | <b>Hydrogen bond</b>                          | <b>15.6</b>                            | <b>&lt; 1 min</b> | <b>RT</b>              |

**Table S2.** Performance comparison of this work with previous reported self-healing materials.

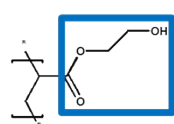

Donor & Acceptor

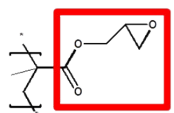

Donor

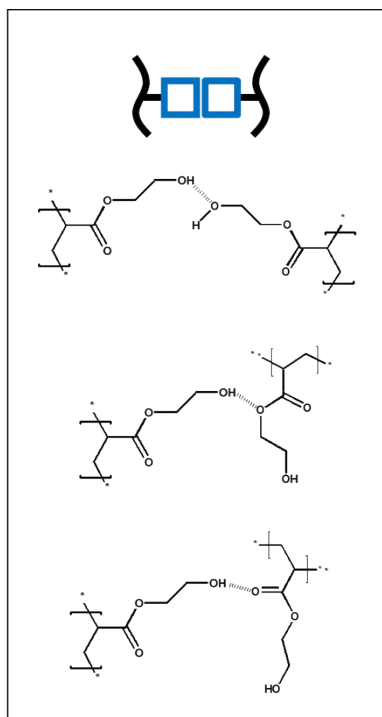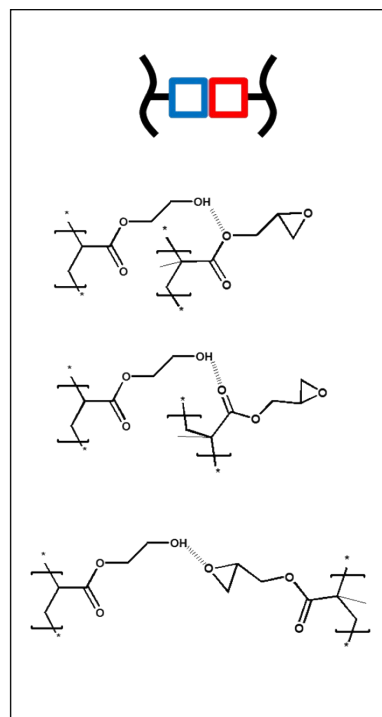

**Figure S1.** Possible combinations of hydrogen bonding in pGH network

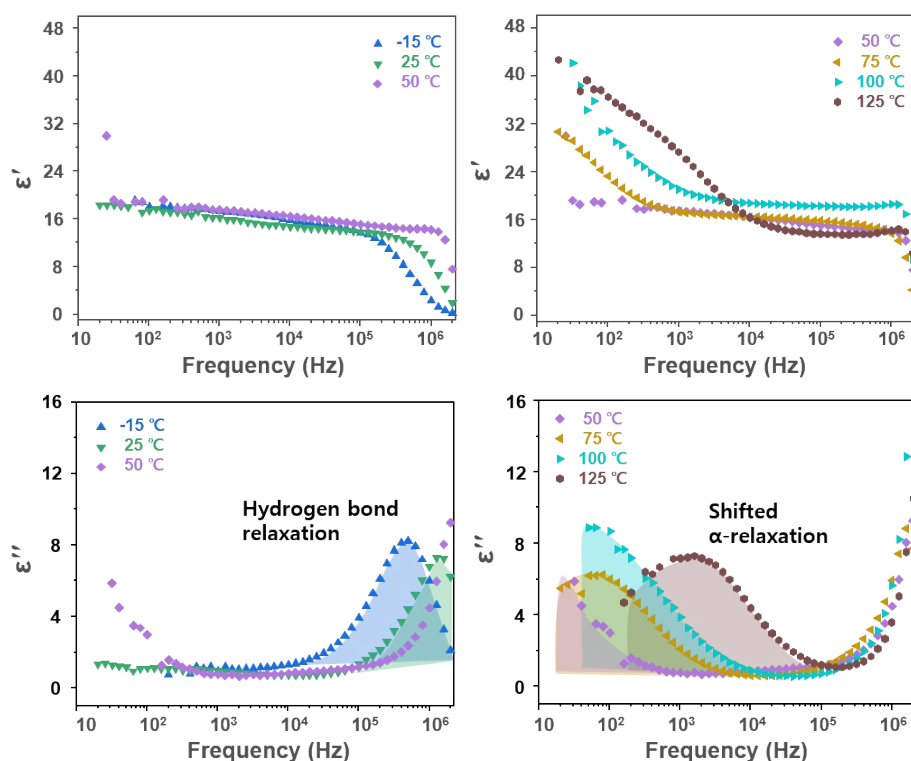

**Figure S2.** Dielectric relaxation spectroscopy (DRS) plot of real ( $\epsilon'$ , top) and imaginary ( $\epsilon''$ , bottom) permittivity vs frequency of pHEA at -15, 25, 50, 75, 100, 125 °C

It was assumed that two kinds of intermolecular interactions, hydrogen bonding and  $\alpha$ -relaxation exist in pHEA. At -15 and 25 °C, a peak was observed at around  $10^6$  Hz ( $\mu$ sec-scale) and right-shift with increasing temperature.

Further temperature increase induced other peak is shifted from lower frequency. The peak does not disappear even at 125 °C which is considered to be high enough to dissociate hydrogen bonding. Thus, we expected that the later peak is related with  $\alpha$ -relaxation of polymer chain and the first one is related to hydrogen bonding relaxation.

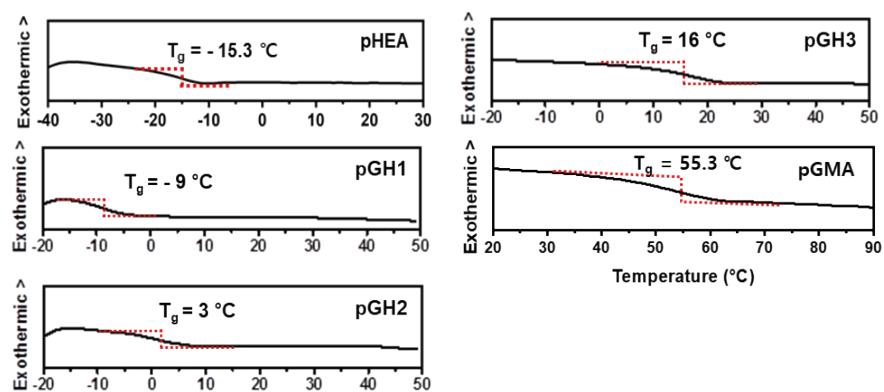

**Figure S1.** Glass transition temperature of pHEA, pGH1, pGH2, pGH3, and pGMA measured by differential scanning calorimetry (DSC)

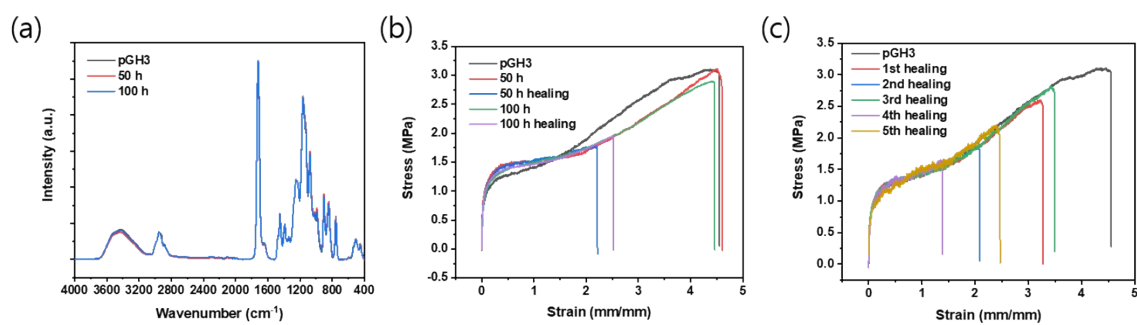

**Figure S4.** (a) FT-IR spectra of pGH3 with its storage time 0 h, 50 h and 100 h. (b) Strain-stress curve of pGH3, pGH3s after each storage time (50 and 100 hours), healed those, and (c) repeated damaged pGH3.

We checked the change in the FT-IR spectra of pGH3 along with the storage time. (**Figure S4a**) The first curve was measured just after the deposition process, and the same measurements were repeated after 50-hr, and 100-hr thereafter. Even after 100 hours, the FT-IR spectra were practically identical to each other, strongly suggesting no appreciable chemical degradation in this time interval. Moreover, the self-healing property also remained unchanged even after 100 hrs from the deposition, confirmed by checking the S-S curve (**Figure S4b**), confirming the excellent long-term stability of the copolymer films. The self-healing property was also repeatedly recoverable, as in **Figure S4c**, 5 times of recovery was attempted to pGH3 film.

**Movie S1.** Stretching of pristine pGH2 and rapid self-healing of pGH2 elastomer ( $2 \times$  speed).

Captured images from this movie are shown in Figure 3b.

**Movie S2.** Conductivity healing of gold electrode coated on pGH1. Captured images from this movie are shown in Figure 4b.
